# Supplementary material for: Top Canopy Height and Stem Size Variation Enhance Aboveground Biomass across Spatial Scales in Seasonal Tropical Forests
Source: MDPI journal article supplement (doi:10.3390/plants12061343), 2023-03-16

## **Appendix A: Supplementary information**

**Table S1.** Summary of the variables used in the study

| Variable                                             | Unit                | Mean  | S.D.  | Range      |
|------------------------------------------------------|---------------------|-------|-------|------------|
| <b>Small scale, 20 m × 20 m scale, 1000 quadrats</b> |                     |       |       |            |
| Elevation                                            | m                   | 818   | 117   | 659-1049   |
| TCH (Mean top canopy height)                         | m                   | 23.4  | 7.4   | 6.6-49.7   |
| Stem size variation                                  | unitless            | 1.42  | 0.36  | 0.47-3.39  |
| Stem abundance                                       | N ha <sup>-1</sup>  | 4125  | 1375  | 450-8800   |
| Species richness                                     | unitless            | 43    | 9     | 10-78      |
| AGB (Aboveground biomass)                            | Mg ha <sup>-1</sup> | 317.9 | 224.8 | 30.4-1557  |
| <b>Large scale, 50 m × 50 m scale, 160 quadrats</b>  |                     |       |       |            |
| Elevation                                            | unitless            | 818   | 117   | 659-1049   |
| TCH (Mean top canopy height)                         | m                   | 23.4  | 6.0   | 12.1-42.9  |
| Stem size variation                                  | unitless            | 1.54  | 0.24  | 0.92-2.22  |
| Stem abundance                                       | N ha <sup>-1</sup>  | 4244  | 1116  | 1956-7380  |
| Species richness                                     | unitless            | 107   | 18    | 68-149     |
| AGB (Aboveground biomass)                            | Mg ha <sup>-1</sup> | 262.4 | 127.9 | 48.9-719.1 |

Note: original variables are shown here, whereas transformed datasets are used in analysis.

Table S2. Direct, indirect and total standardized effects of predictors on AGB (aboveground biomass) at scale of 20 m × 20 m, based on the structural equation model. Significant effects ( $P < 0.05$ ) are indicated in bold. Abbreviations are explained in Table S1. See model in Fig. 2a

| Response variable   | Mediator variable   | Predictor variable  | Effect   | Beta  | S.E. | Z-value | P-value      |
|---------------------|---------------------|---------------------|----------|-------|------|---------|--------------|
| AGB                 |                     | Elevation           | Direct   | 0.10  | 0.02 | 5.95    | <b>0.000</b> |
| AGB                 |                     | TCH                 | Direct   | 0.21  | 0.02 | 10.43   | <b>0.000</b> |
| AGB                 |                     | Stem abundance      | Direct   | 0.17  | 0.02 | 8.17    | <b>0.000</b> |
| AGB                 |                     | Stem size variation | Direct   | 0.71  | 0.02 | 35.00   | <b>0.000</b> |
| AGB                 |                     | Species richness    | Direct   | 0.04  | 0.02 | 1.90    | 0.057        |
| TCH                 |                     | Elevation           | Direct   | -0.22 | 0.03 | -7.11   | <b>0.000</b> |
| Stem abundance      |                     | Elevation           | Direct   | 0.20  | 0.03 | 6.49    | <b>0.000</b> |
| Stem size variation |                     | Elevation           | Direct   | -0.05 | 0.03 | -1.77   | 0.077        |
| Species richness    |                     | Elevation           | Direct   | 0.03  | 0.03 | 1.18    | 0.237        |
| Stem size variation |                     | TCH                 | Direct   | 0.62  | 0.03 | 24.68   | <b>0.000</b> |
| Species richness    |                     | TCH                 | Direct   | 0.04  | 0.03 | 1.28    | 0.200        |
| Stem size variation |                     | Stem abundance      | Direct   | -0.03 | 0.03 | -1.29   | 0.199        |
| Species richness    |                     | Stem size variation | Direct   | 0.09  | 0.03 | 3.02    | <b>0.002</b> |
| AGB                 | TCH                 | Elevation           | Indirect | -0.05 | 0.01 | -5.88   | <b>0.000</b> |
| AGB                 | Stem abundance      | Elevation           | Indirect | 0.04  | 0.01 | 5.08    | <b>0.000</b> |
| AGB                 | Stem size variation | Elevation           | Indirect | -0.03 | 0.02 | -1.76   | 0.078        |
| AGB                 | Species richness    | Elevation           | Indirect | 0.00  | 0.00 | 1.00    | 0.315        |
| AGB                 | Stem size variation | TCH                 | Indirect | 0.44  | 0.02 | 20.17   | <b>0.000</b> |
| AGB                 | species richness    | TCH                 | Indirect | 0.00  | 0.00 | 1.06    | 0.288        |
| AGB                 | Stem size variation | Stem abundance      | Indirect | 0.00  | 0.00 | -1.06   | 0.287        |
| AGB                 | Species richness    | Stem abundance      | Indirect | 0.03  | 0.01 | 1.90    | 0.058        |
| AGB                 | Species richness    | Stem size variation | Indirect | 0.00  | 0.00 | 1.61    | 0.108        |
|                     | TCH                 |                     |          |       |      |         |              |
| AGB                 | Species richness    | Elevation           | Indirect | -0.04 | 0.02 | -2.06   | <b>0.039</b> |
|                     | Stem abundance      |                     |          |       |      |         |              |
|                     | Stem size variation |                     |          |       |      |         |              |
| AGB                 | Species richness    | TCH                 | Indirect | 0.44  | 0.02 | 20.24   | <b>0.000</b> |
|                     | Stem size variation |                     |          |       |      |         |              |
| AGB                 | Species richness    | Stem abundance      | Indirect | 0.00  | 0.02 | 0.15    | 0.881        |
|                     | Stem size variation |                     |          |       |      |         |              |
| AGB                 | Species richness    | Stem size variation | Indirect | 0.00  | 0.00 | 1.61    | 0.108        |
|                     | TCH                 |                     |          |       |      |         |              |
| AGB                 | Stem abundance      | Elevation           | Total    | 0.06  | 0.03 | 2.12    | <b>0.034</b> |
|                     | Stem size variation |                     |          |       |      |         |              |
|                     | Species richness    |                     |          |       |      |         |              |
| AGB                 | Stem abundance      | TCH                 | Total    | 0.66  | 0.02 | 27.20   | <b>0.000</b> |
|                     | Stem size variation |                     |          |       |      |         |              |

|                     |                     |                     |       |       |      |       |              |
|---------------------|---------------------|---------------------|-------|-------|------|-------|--------------|
|                     | Species richness    |                     |       |       |      |       |              |
| AGB                 | Species richness    | Stem abundance      | Total | 0.18  | 0.02 | 7.36  | <b>0.000</b> |
|                     | Stem size variation |                     |       |       |      |       |              |
| AGB                 | Species richness    | Stem size variation | Total | 0.72  | 0.02 | 35.28 | <b>0.000</b> |
|                     | TCH                 |                     |       |       |      |       |              |
| Species richness    | Stem abundance      | Elevation           | Total | 0.15  | 0.03 | 4.71  | <b>0.000</b> |
|                     | Stem size variation |                     |       |       |      |       |              |
| Species richness    | Stem size variation | TCH                 | Total | 0.10  | 0.02 | 3.97  | <b>0.000</b> |
| Stem size variation | TCH                 | Elevation           | Total | -0.19 | 0.03 | -6.04 | <b>0.000</b> |

Table S3. Direct, indirect and total standardized effects of predictors on AGB (aboveground biomass) at scale of 50 m  $\times$  50 m, based on the structural equation model. Significant effects ( $P < 0.05$ ) are indicated in bold. Abbreviations are explained in Table S1. See model in Fig. 3a,

| Response variable   | Mediator variable                      | Predictor variable  | Effect   | Beta  | S.E. | Z-value | P-value      |
|---------------------|----------------------------------------|---------------------|----------|-------|------|---------|--------------|
| AGB                 | --                                     | Elevation           | Direct   | 0.12  | 0.04 | 3.23    | <b>0.001</b> |
| AGB                 | --                                     | TCH                 | Direct   | 0.55  | 0.06 | 9.79    | <b>0.000</b> |
| AGB                 | --                                     | Stem abundance      | Direct   | 0.30  | 0.04 | 6.64    | <b>0.000</b> |
| AGB                 | --                                     | Stem size variation | Direct   | 0.44  | 0.06 | 7.74    | <b>0.000</b> |
| AGB                 | --                                     | Species richness    | Direct   | -0.11 | 0.04 | -2.58   | <b>0.010</b> |
| TCH                 | --                                     | Elevation           | Direct   | -0.29 | 0.08 | -3.84   | <b>0.000</b> |
| Stem abundance      | --                                     | Elevation           | Direct   | 0.20  | 0.08 | 2.59    | <b>0.010</b> |
| Stem size variation | --                                     | Elevation           | Direct   | -0.05 | 0.05 | -0.95   | 0.342        |
| Species richness    | --                                     | Elevation           | Direct   | -0.03 | 0.07 | -0.51   | 0.614        |
| Stem size variation | --                                     | TCH                 | Direct   | 0.75  | 0.05 | 14.84   | <b>0.000</b> |
| Species richness    | --                                     | TCH                 | Direct   | -0.04 | 0.10 | -0.40   | 0.691        |
| Stem size variation | --                                     | Stem abundance      | Direct   | -0.11 | 0.05 | -2.29   | <b>0.022</b> |
| Species richness    | --                                     | Stem size variation | Direct   | -0.07 | 0.10 | -0.66   | 0.507        |
| AGB                 | TCH                                    | Elevation           | Indirect | -0.16 | 0.04 | -3.58   | <b>0.000</b> |
| AGB                 | Stem abundance                         | Elevation           | Indirect | 0.06  | 0.02 | 2.41    | <b>0.016</b> |
| AGB                 | Stem size variation                    | Elevation           | Indirect | -0.02 | 0.02 | -0.94   | 0.346        |
| AGB                 | Species richness                       | Elevation           | Indirect | 0.00  | 0.01 | 0.50    | 0.620        |
| AGB                 | Stem size variation                    | TCH                 | Indirect | 0.33  | 0.05 | 6.86    | <b>0.000</b> |
| AGB                 | species richness                       | TCH                 | Indirect | 0.01  | 0.01 | 0.39    | 0.695        |
| AGB                 | Stem size variation                    | Stem abundance      | Indirect | 0.01  | 0.01 | 1.71    | 0.087        |
| AGB                 | Species richness                       | Stem abundance      | Indirect | -0.07 | 0.03 | -2.49   | 0.013        |
| AGB                 | Species richness                       | Stem size variation | Indirect | 0.01  | 0.01 | 0.64    | 0.521        |
|                     | TCH                                    |                     |          |       |      |         |              |
| AGB                 | Species richness                       | Elevation           | Indirect | -0.12 | 0.06 | -2.10   | <b>0.036</b> |
|                     | Stem abundance                         |                     |          |       |      |         |              |
|                     | Stem size variation                    |                     |          |       |      |         |              |
| AGB                 | Species richness                       | TCH                 | Indirect | 0.33  | 0.05 | 6.77    | <b>0.000</b> |
|                     | Stem size variation                    |                     |          |       |      |         |              |
| AGB                 | Species richness                       | Stem abundance      | Indirect | -0.12 | 0.04 | -3.34   | <b>0.001</b> |
|                     | Stem size variation                    |                     |          |       |      |         |              |
| AGB                 | Species richness                       | Stem size variation | Indirect | 0.01  | 0.01 | 0.64    | 0.521        |
|                     | TCH                                    |                     |          |       |      |         |              |
| AGB                 | Stem abundance                         | Elevation           | Total    | 0.00  | 0.07 | 0.03    | 0.976        |
|                     | Stem size variation                    |                     |          |       |      |         |              |
|                     | Species richness                       |                     |          |       |      |         |              |
| AGB                 | Stem abundance,<br>Stem size variation | TCH                 | Total    | 0.88  | 0.04 | 20.00   | <b>0.000</b> |

|                     |                     |                     |       |       |      |       |              |
|---------------------|---------------------|---------------------|-------|-------|------|-------|--------------|
|                     | Species richness    |                     |       |       |      |       |              |
| AGB                 | Species richness    | Stem abundance      | Total | 0.18  | 0.04 | 4.23  | <b>0.000</b> |
|                     | Stem size variation |                     |       |       |      |       |              |
| AGB                 | Species richness    | Stem size variation | Total | 0.45  | 0.06 | 7.73  | <b>0.000</b> |
|                     | TCH                 |                     |       |       |      |       |              |
| Species richness    | Stem abundance      | Elevation           | Total | 0.10  | 0.08 | 1.24  | 0.217        |
|                     | Stem size variation |                     |       |       |      |       |              |
| Species richness    | Stem size variation | TCH                 | Total | -0.09 | 0.07 | -1.39 | 0.165        |
| Stem size variation | TCH                 | Elevation           | Total | -0.29 | 0.08 | -3.86 | <b>0.000</b> |

---

Fig. S1. Pearson's correlation coefficient between all pairs of variables at scale used in this meta-analysis. Red to green color indicates negative to positive correlation, the shade extents of circles represent correlation coefficient ( $r$ ) size, and insignificant correlations ( $P > 0.05$ ) include crosses inside the circles. Abbreviations for variables are explained in Table S1.

(a) 20 m × 20 m scale

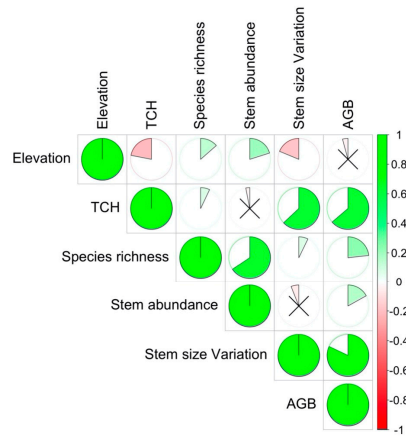

(b) 50 m × 50 m scale

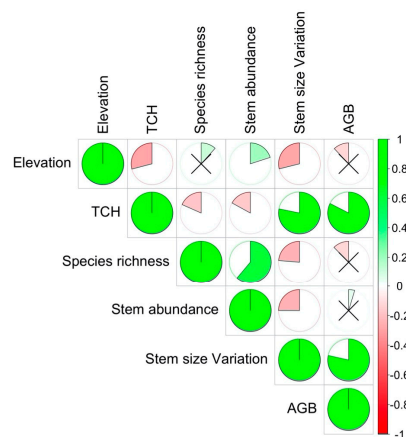

Supplement: s1 [file s1]
